# Supplementary material for: Effects of Positive Hepatitis B Core Antibody and Metabolic Disorders in Hepatocellular Carcinoma in an Endemic Area of Hepatitis B Virus
Source: PubMed Central journal article supplement — Cancer Control. 2021 Sep 27;28:10732748211039758. doi: 10.1177/10732748211039758 (PMC8481710; doi:10.1177/10732748211039758), 2021-09-27
Supplement: sj-pdf-1-ccx-10.1177_10732748211039758.pdf [file sj-pdf-1-ccx-10.1177_10732748211039758.pdf]

Supplementary table 1. Clinical characteristics of HCC patients (N = 1950)

|                                            | HBV<br>(n = 1367)              | HCV<br>(n = 254)              | Alcohol<br>(n = 172) | Non-viral and<br>non-alcoholic<br>(n = 157) | Non-viral and non-alcoholic<br>vs. |                       |                           | Value<br>s are<br>expre<br>ssed<br>as<br>mean<br>s ±<br>stand<br>ard<br>devia<br>tion<br>or<br>numb<br>er (%) |
|--------------------------------------------|--------------------------------|-------------------------------|----------------------|---------------------------------------------|------------------------------------|-----------------------|---------------------------|---------------------------------------------------------------------------------------------------------------|
|                                            |                                |                               |                      |                                             | HBV<br><i>P</i> value              | HCV<br><i>P</i> value | alcohol<br><i>P</i> value |                                                                                                               |
| Age                                        | 55 ± 10                        | 69 ± 10                       | 63 ± 10              | 68 ± 12                                     | < 0.001                            | 0.671                 | < 0.001                   |                                                                                                               |
| Sex (male)                                 | 1083 (79.2)                    | 164 (64.6)                    | 167 (97.1)           | 106 (67.5)                                  | 0.001                              | 0.593                 | < 0.001                   |                                                                                                               |
| Diabetes                                   | 257 (18.8)                     | 83 (32.7)                     | 62 (36.0)            | 62 (39.4)                                   | < 0.001                            | 0.169                 | 0.569                     |                                                                                                               |
| Hypertension                               | 350 (25.6)                     | 120 (47.2)                    | 62 (36.0)            | 72 (45.9)                                   | < 0.001                            | 0.839                 | 0.074                     |                                                                                                               |
| Total cholesterol > 200 mg/dL <sup>†</sup> | 149 (10.9)                     | 13 (5.1)                      | 15 (8.7)             | 19 (12.1)                                   | 0.686                              | 0.013                 | 0.366                     |                                                                                                               |
| Triglyceride > 150 mg/dL <sup>†</sup>      | 75 (5.5)                       | 25 (9.8)                      | 22 (12.8)            | 17 (10.8)                                   | 0.012                              | 0.741                 | 0.612                     |                                                                                                               |
| BMI ≥ 25 <sup>†</sup>                      | 410 (30.0)                     | 79 (31.1)                     | 56 (32.6)            | 48 (30.6)                                   | 0.927                              | 1.000                 | 0.723                     |                                                                                                               |
| BMI ≥ 30 <sup>†</sup>                      | 47 (3.5)                       | 8 (3.2)                       | 6 (3.6)              | 9 (6.1)                                     | 0.113                              | 0.203                 | 0.304                     |                                                                                                               |
| AFP, median (Q1–Q3), ng/mL                 | 76 (10–9.1 × 10 <sup>2</sup> ) | 37 (9–2.7 × 10 <sup>2</sup> ) | 9 (4–61)             | 13 (4–1.1 × 10 <sup>3</sup> )               | 0.801                              | 0.196                 | 0.128                     |                                                                                                               |
| APRI ≥ 1.5                                 | 496 (36.3)                     | 116 (45.7)                    | 53 (30.8)            | 28 (17.8)                                   | < 0.001                            | < 0.001               | 0.007                     |                                                                                                               |
| FIB-4 ≥ 3.25                               | 735 (53.8)                     | 195 (76.8)                    | 105 (61.0)           | 75 (47.8)                                   | 0.177                              | < 0.001               | 0.020                     |                                                                                                               |
| Prothrombin time (INR)                     | 1.2 ± 0.2                      | 1.2 ± 0.2                     | 1.2 ± 0.2            | 1.1 ± 0.2                                   | < 0.001                            | 0.001                 | < 0.001                   |                                                                                                               |
| CTP score                                  | 6 ± 1                          | 6 ± 1                         | 6 ± 2                | 6 ± 1                                       | 0.170                              | < 0.001               | 0.003                     |                                                                                                               |
| CTP class A                                | 1088 (79.6)                    | 194 (76.4)                    | 121 (70.3)           | 134 (85.4)                                  | 0.091                              | 0.031                 | 0.001                     |                                                                                                               |
| Liver cirrhosis                            | 1099 (80.4)                    | 214 (84.3)                    | 126 (73.3)           | 67 (42.7)                                   | < 0.001                            | < 0.001               | < 0.001                   |                                                                                                               |
| Positive for anti-HBc <sup>†</sup>         | -                              | 153 (81.4)                    | 118 (79.7)           | 116 (82.9)                                  | -                                  | 0.773                 | 0.547                     |                                                                                                               |

†Some patients lacked clinical information at the time of HCC diagnosis

Abbreviations: anti-HBc, anti-hepatitis B core antibody; APRI, aspartate aminotransferase to platelet ratio index; FIB-4, fibrosis-4; HBV, hepatitis B virus; HCV, hepatitis C virus; BMI, body mass index; AFP, alpha-fetoprotein; AST, aspartate aminotransferase; ALT, alanine aminotransferase ; APRI, aspartate aminotransferase to platelet ratio index; FIB-4, fibrosis-4 ; CTP, Child-Turcotte-Pugh

Supplementary table 2. Tumor characteristics of HCC patients (N = 1950)

|                                      | HBV<br>(n = 1367) | HCV<br>(n = 254) | Alcohol<br>(n = 172) | Non-viral and<br>non-alcoholic<br>(n = 157) | Non-viral and non-alcoholic<br>vs. |                       |                           | Value<br>s are<br>expre<br>ssed<br>as<br>numb<br>er (%)<br>Tum<br>or<br>chara<br>cteris<br>tics<br>were<br>evalu<br>ated<br>as a<br>result<br>of<br>MRI<br>or<br>CT |
|--------------------------------------|-------------------|------------------|----------------------|---------------------------------------------|------------------------------------|-----------------------|---------------------------|---------------------------------------------------------------------------------------------------------------------------------------------------------------------|
|                                      |                   |                  |                      |                                             | HBV<br><i>P</i> value              | HCV<br><i>P</i> value | alcohol<br><i>P</i> value |                                                                                                                                                                     |
| Uni-nodular tumor                    | 729 (53.3)        | 140 (55.1)       | 110 (64.0)           | 98 (62.4)                                   | 0.034                              | 0.151                 | 0.819                     |                                                                                                                                                                     |
| Largest tumor size, ≤ 5cm            | 775 (56.7)        | 187 (73.6)       | 108 (62.8)           | 69 (43.9)                                   | 0.003                              | < 0.001               | < 0.001                   |                                                                                                                                                                     |
| Portal vein thrombosis               | 440 (32.2)        | 49 (19.3)        | 41 (23.8)            | 49 (31.2)                                   | 0.857                              | 0.009                 | 0.140                     |                                                                                                                                                                     |
| Extrahepatic metastasis <sup>†</sup> | 219 (16.1)        | 25 (9.9)         | 19 (11.2)            | 31 (19.9)                                   | 0.255                              | 0.007                 | 0.032                     |                                                                                                                                                                     |
| mUICC staging, n (%) <sup>†</sup>    |                   |                  |                      |                                             | 0.532                              | 0.029                 | 0.010                     |                                                                                                                                                                     |
| I                                    | 217 (16.0)        | 46 (18.2)        | 42 (24.7)            | 19 (12.2)                                   |                                    |                       |                           |                                                                                                                                                                     |
| II                                   | 489 (36.0)        | 111 (43.9)       | 67 (39.4)            | 58 (37.2)                                   |                                    |                       |                           |                                                                                                                                                                     |
| III                                  | 259 (19.1)        | 53 (20.9)        | 30 (17.6)            | 35 (22.4)                                   |                                    |                       |                           |                                                                                                                                                                     |
| IV/V                                 | 394 (29.0)        | 43 (17.0)        | 31 (18.2)            | 44 (28.2)                                   |                                    |                       |                           |                                                                                                                                                                     |
| BCLC staging, n (%)                  |                   |                  |                      |                                             | 0.011                              | < 0.001               | 0.044                     |                                                                                                                                                                     |
| 0/A                                  | 599 (43.8)        | 135 (53.1)       | 80 (46.5)            | 52 (33.1)                                   |                                    |                       |                           |                                                                                                                                                                     |
| B                                    | 253 (18.5)        | 64 (25.2)        | 39 (22.7)            | 42 (26.8)                                   |                                    |                       |                           |                                                                                                                                                                     |
| C/D                                  | 515 (37.7)        | 55 (21.7)        | 53 (30.8)            | 63 (40.1)                                   |                                    |                       |                           |                                                                                                                                                                     |
| 1 <sup>st</sup> treatment, n (%)     |                   |                  |                      |                                             |                                    |                       |                           |                                                                                                                                                                     |
| Curative therapy <sup>†</sup>        | 202 (14.8)        | 59 (23.2)        | 33 (19.2)            | 21 (13.4)                                   | 0.810                              | 0.020                 | 0.182                     |                                                                                                                                                                     |
| Surgical resection                   | 50 (3.7)          | 5 (2.0)          | 5 (2.9)              | 6 (3.8)                                     |                                    |                       |                           |                                                                                                                                                                     |
| Liver transplantation                | 16 (1.2)          | 3 (1.2)          | 2 (1.2)              | 0 (0.0)                                     |                                    |                       |                           |                                                                                                                                                                     |
| RFA/PEI                              | 136 (10.0)        | 51 (20.1)        | 26 (15.1)            | 15 (9.6)                                    |                                    |                       |                           |                                                                                                                                                                     |

scans used at the time of HCC diagnosis.

<sup>†</sup>Some patients lacked clinical information at the time of HCC diagnosis.

‡Patients not indicated for curative therapies were applied to palliative therapies including transarterial chemoembolization, transarterial radioembolization, radiotherapy, systemic treatments, or conservative treatment.

Abbreviations: BCLC, Barcelona Clinic Liver Cancer; HBV, hepatitis B virus; HCV, hepatitis C virus; mUICC, modified Union for International Cancer Control
